# Supplementary material
Source: publisher figshare collection journal article supplement (https://plos.figshare.com/articles/dataset/_/1573633)

Relative intensity at Rab5

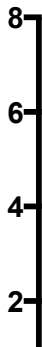

○ FYVE-EEA1  
■ ML1Nx2

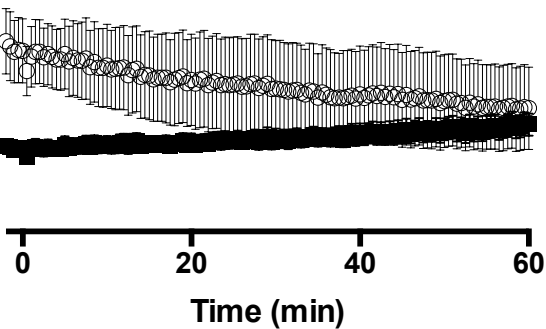

Supplement: Supplementary file 3 [file 1]

nMDP

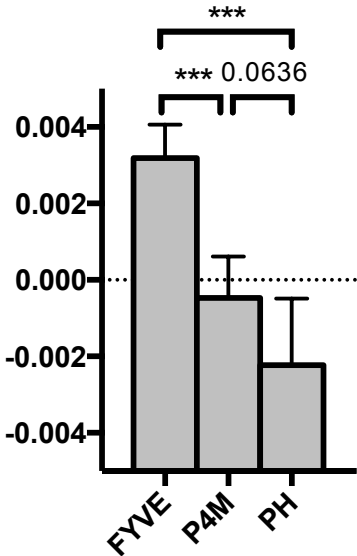

Supplement: Supplementary file 4 [file 1]

Relative intensity at Rab5

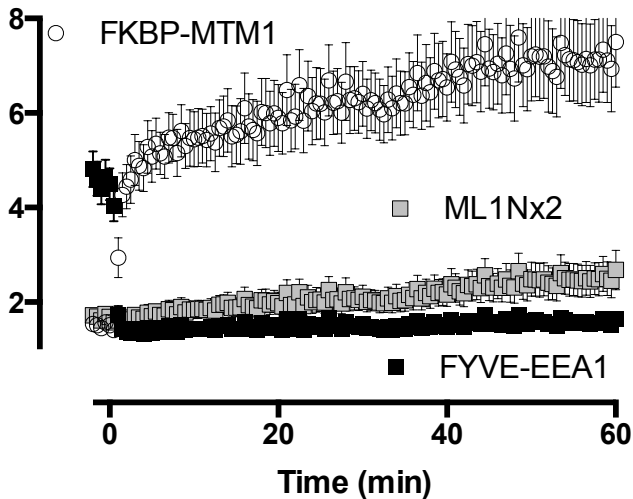

Supplement: Supplementary file 6 [file 1]

# MTM

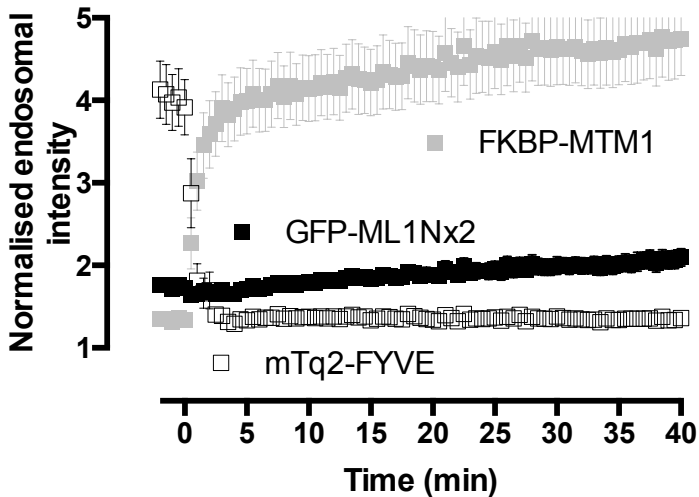

Supplement: Supplementary file 7 [file 1]

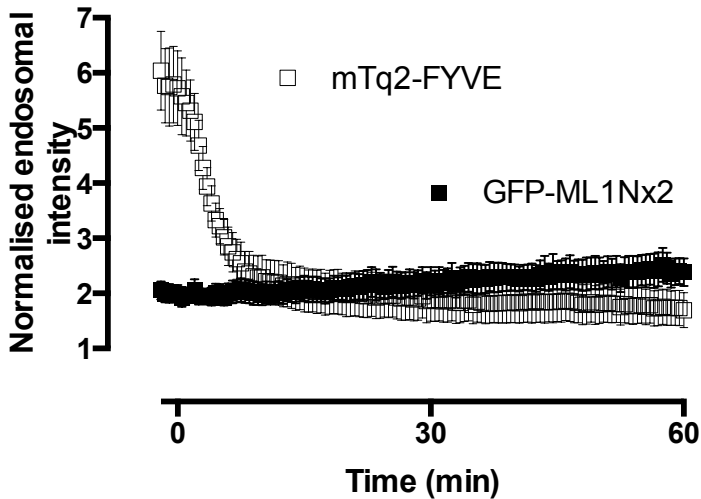

Supplement: Supplementary file 9 [file 1]
